# Supplementary material for: TiO2/(BiO)2CO3 nanocomposites for ultraviolet filtration with reduced photocatalytic activity
Source: Royal Society of Chemistry journal article supplement (doi:10.1039/c8tc01330f), 2018-01-01
Supplement: c8tc01330f1.pdf [file c8tc01330f1.pdf]

## *Supporting Information*

# **TiO<sub>2</sub>/(BiO)<sub>2</sub>CO<sub>3</sub> Nanocomposites for Ultraviolet Filtration with Reduced Photocatalytic Activity**

Kathrin Bogusz,<sup>†,‡</sup> Moeava Tehei,<sup>‡,§,||</sup> Michael Lerch,<sup>‡,||</sup> Shi Xue Dou,<sup>†</sup> Hua Kun Liu,<sup>†</sup> and  
Konstantin Konstantinov<sup>\*,†,‡</sup>

<sup>†</sup> Institute for Superconducting and Electronic Materials, Australian Institute for Innovative  
Materials, University of Wollongong, NSW 2522, Australia.

<sup>‡</sup> Illawarra Health and Medical Research Institute, University of Wollongong, NSW 2522,  
Australia.

<sup>§</sup> School of Chemistry, Faculty of Science, Medicine and Health, University of Wollongong,  
NSW 2522, Australia.

<sup>||</sup> Centre for Medical and Radiation Physics, Faculty of Engineering and Information Science,  
University of Wollongong, NSW 2522, Australia.

\*Email - konstan@uow.edu.au

## Supporting Figures

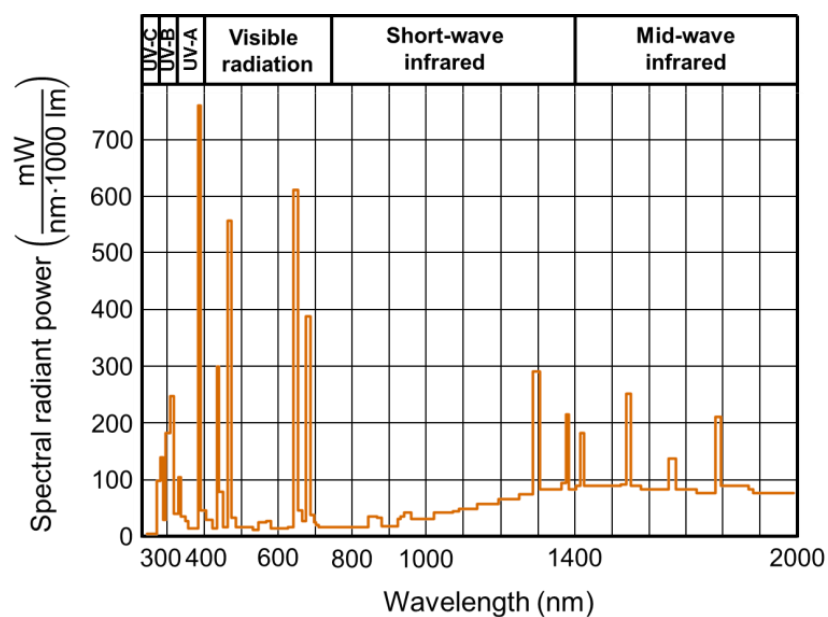

**Figure S1.** Adapted light emission profile of the OSRAM Ultra-Vitalux® 300 W Sunlamp.<sup>1</sup>

## Reference

- (1) Deka, M.; Humar, M.; Rep, G.; Kričej, B.; Šentjurc, M.; Petrič, M. Effects of UV Light Irradiation on Colour Stability of Thermally Modified, Copper Ethanolamine Treated and Non-Modified Wood: EPR and DRIFT Spectroscopic Studies. *Wood Sci. Technol.* **2008**, *42*, 5 – 20.

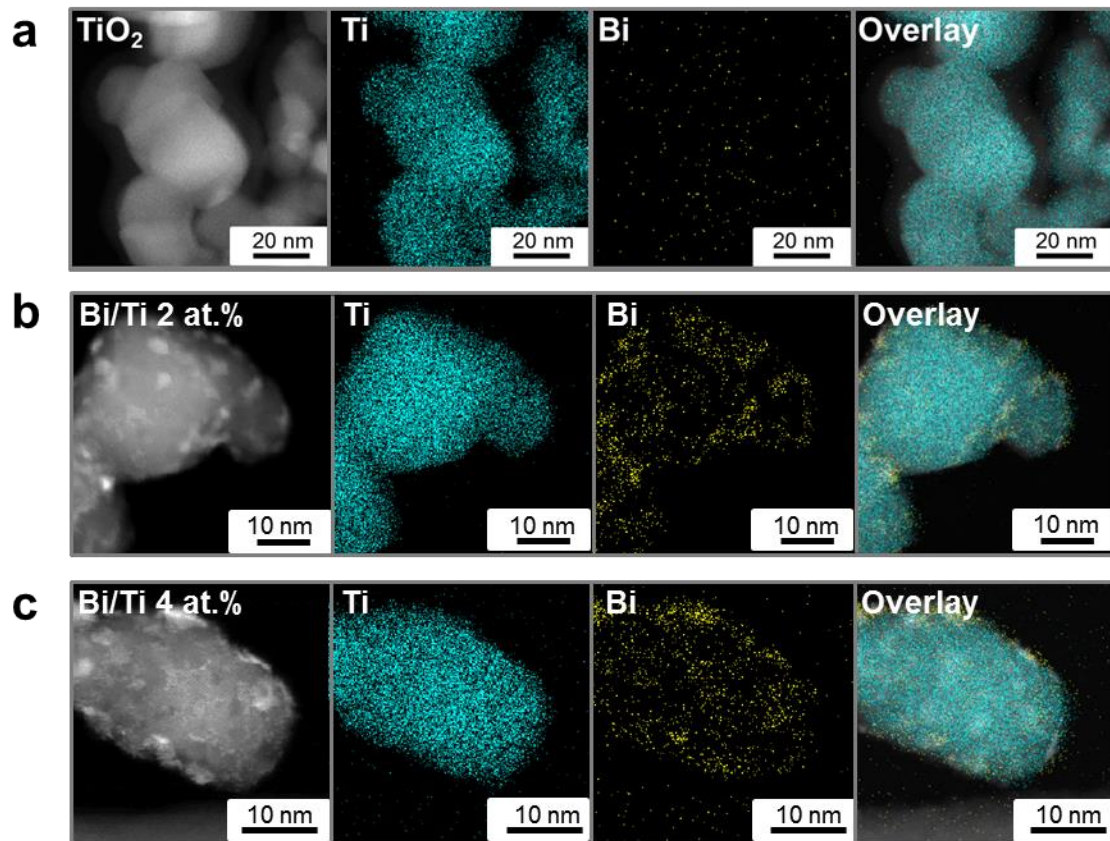

**Figure S2.** TEM images with high resolution EDS mapping of a) TiO<sub>2</sub> NPs, b) TiO<sub>2</sub>/(BiO)<sub>2</sub>CO<sub>3</sub> sample Bi/Ti 2 at.%, and c) TiO<sub>2</sub>/(BiO)<sub>2</sub>CO<sub>3</sub> sample Bi/Ti 4 at.%.

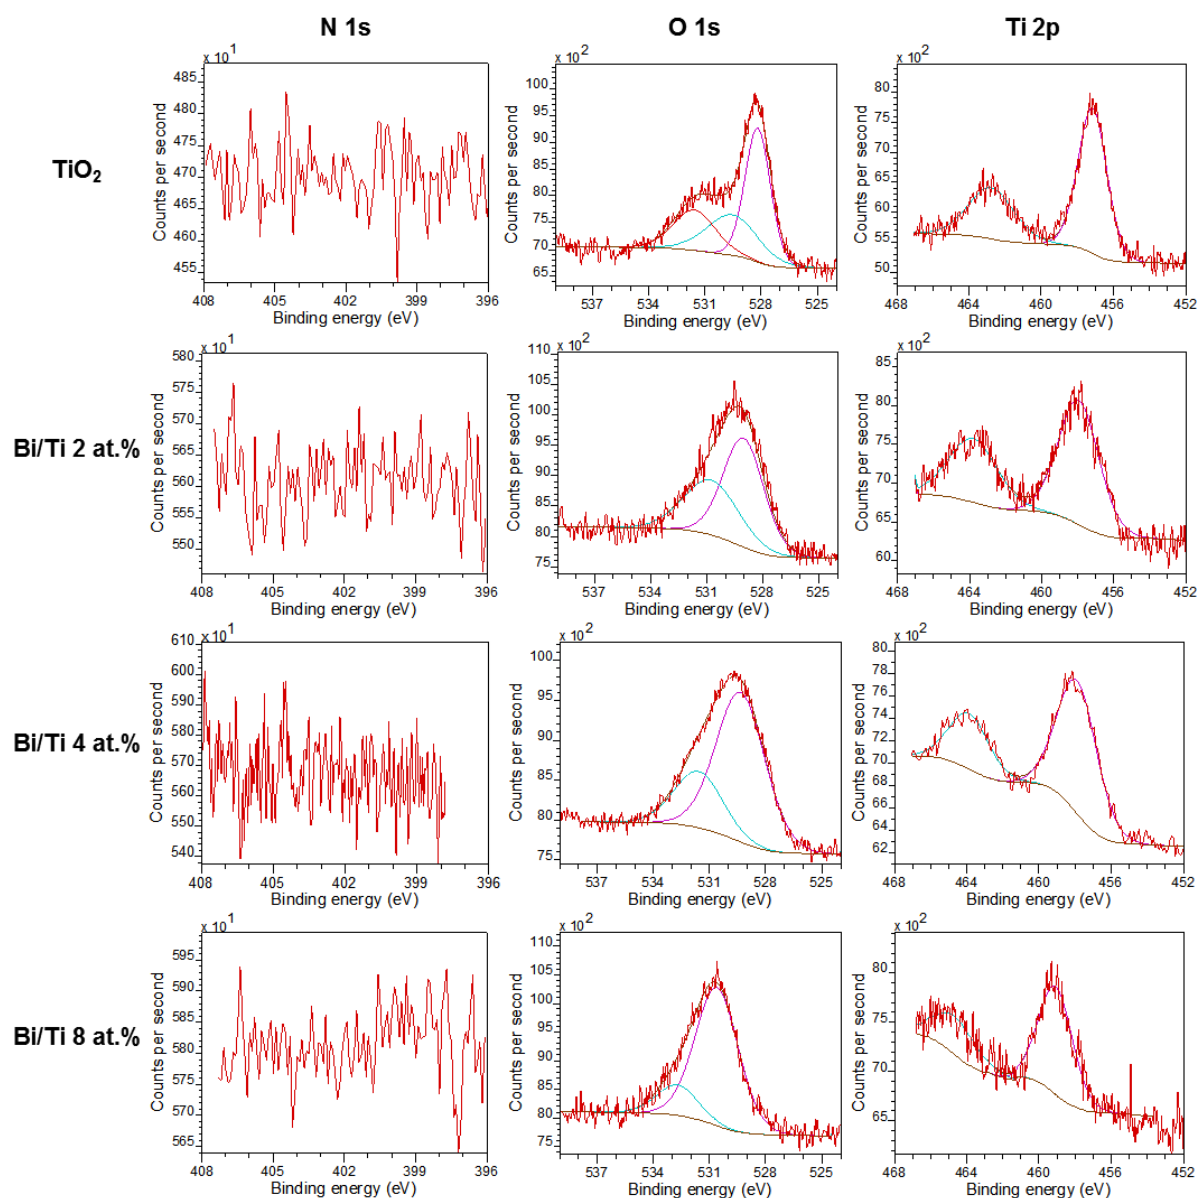

**Figure S3.** High resolution XPS spectra of the N 1s (left column), O 1s (centre column), and Ti 2p (right column) regions for the commercial  $\text{TiO}_2$  NPs, and  $\text{TiO}_2/(\text{BiO})_2\text{CO}_3$  nanocomposites with different Bi/Ti atomic ratios.

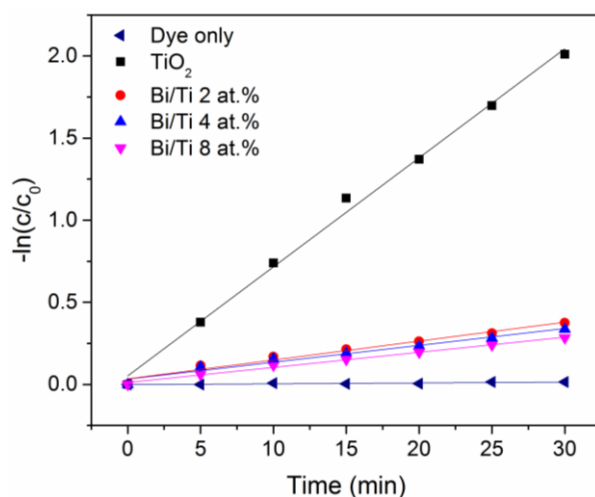

**Figure S4.** Apparent rate constant curves for the UV-visible dye degradation of crystal violet, as shown in Figure 5a. The concentration of all nanomaterials is 5 mg/L.

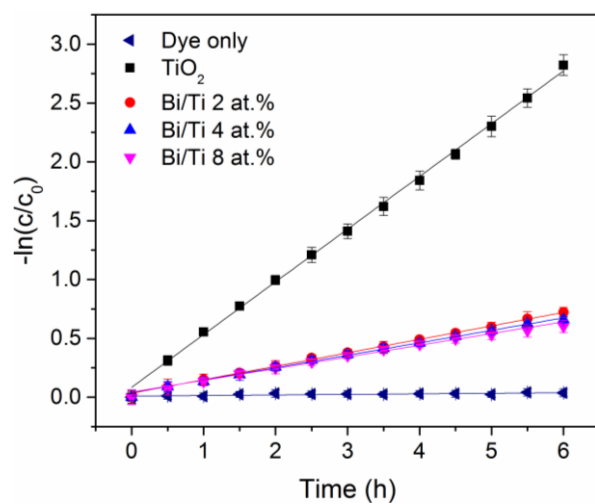

**Figure S5.** Apparent rate constant curves for the dye degradation of crystal violet under exposure to AM 1.5 G one sun ( $100 \text{ mW/cm}^2$ ), as shown in Figure 5b. The concentration of all nanomaterials is 5 mg/L.

## Supporting Table

**Table S1.** High Resolution XPS Data<sup>a</sup>

| Sample           | Bi 4f <sub>5/2</sub> (eV) | Bi 4f <sub>7/2</sub> (eV) | Ti 2p <sub>1/2</sub> (eV) | Ti 2p <sub>3/2</sub> (eV) | C 1s c-o (eV) |
|------------------|---------------------------|---------------------------|---------------------------|---------------------------|---------------|
| TiO <sub>2</sub> | -                         | -                         | 462.83 ± 0.24             | 457.23 ± 0.32             | 286.92 ± 0.28 |
| Bi/Ti 2 at. %    | 164.68 ± 0.45             | 159.31 ± 0.28             | 464.41 ± 0.41             | 458.54 ± 0.44             | 287.57 ± 0.24 |
| Bi/Ti 4 at. %    | 164.85 ± 0.40             | 159.34 ± 0.21             | 464.56 ± 0.39             | 458.56 ± 0.36             | 287.56 ± 0.24 |
| Bi/Ti 8 at. %    | 165.85 ± 0.39             | 160.51 ± 0.43             | 465.26 ± 0.48             | 459.42 ± 0.50             | 287.25 ± 0.23 |

<sup>a</sup>Data is shown for peaks of Bi 4f, Ti 2p, and C 1s for the commercial TiO<sub>2</sub> NPs, and the TiO<sub>2</sub>/(BiO)<sub>2</sub>CO<sub>3</sub> nanocomposites with different Bi/Ti atomic ratios. The C 1s peak of adventitious carbon for all samples is found at 284.83 eV.
